# Supplementary material for: Acid-driven aggregation of selenol-functionalized zwitterionic gold nanoparticles improves the photothermal treatment efficacy of tumors
Source: Royal Society of Chemistry journal article supplement (doi:10.1039/d1qm01561c), 2022-01-01
Supplement: d1qm01561c1.pdf [file d1qm01561c1.pdf]

## Supporting Information

### **Acidic-driven aggregation of selenol-functionalized zwitterionic gold nanoparticles improves photothermal treatment efficacy of tumors**

Bo Hu, Qin Zhang, Xiaoyi Lv, Xiaonan Gao, Xiaojun Liu, Kehua Xu\* and Bo Tang\*

College of Chemistry, Chemical Engineering and Materials Science, Collaborative Innovation Center of Functionalized Probes for Chemical Imaging in Universities of Shandong, Key Laboratory of Molecular and Nano Probes, Ministry of Education, Shandong Provincial Key Laboratory of Clean Production of Fine Chemicals, Shandong Normal University, Jinan 250014, P. R. China.

\*E-mail: tangb@sdu.edu.cn, xukehua@sdu.edu.cn

## Table of Contents

|                                                                                                                                 |     |
|---------------------------------------------------------------------------------------------------------------------------------|-----|
| 1. Experimental section.....                                                                                                    | P3  |
| 2. Absorbance peak values of Au-Se-C <sub>x</sub> -N <sub>y</sub> at different pH values.....                                   | P6  |
| 3. Size of Au-Se-C <sub>x</sub> -N <sub>y</sub> at different pH values.....                                                     | P7  |
| 4. Zeta potential of Au NPs and Au-Se-C <sub>x</sub> -N <sub>y</sub> .....                                                      | P8  |
| 5. Size and TEM images of Au NPs and Au-Se-C <sub>4</sub> -N <sub>6</sub> .....                                                 | P8  |
| 6. UV–vis absorption spectra of Au NPs and Au-Se-C <sub>4</sub> -N <sub>6</sub> .....                                           | P9  |
| 7. Digital images of Au-Se-C <sub>4</sub> -N <sub>6</sub> at different pH conditions.....                                       | P9  |
| 8. Size and TEM images of Au-S-C <sub>4</sub> -N <sub>6</sub> .....                                                             | P10 |
| 9. Size of Au-S-C <sub>4</sub> -N <sub>6</sub> in PBS solution at different pH values.....                                      | P10 |
| 10. Size of Au-Se-C <sub>4</sub> -N <sub>6</sub> and Au-S-C <sub>4</sub> -N <sub>6</sub> in present of GSH at different pH..... | P11 |
| 11. Cell cytotoxicity of Au-Se-C <sub>4</sub> -N <sub>6</sub> with different concentrations.....                                | P12 |
| 13. Time-dependent infrared thermal images.....                                                                                 | P13 |
| 14. Images of H&E.....                                                                                                          | P14 |

## **Experimental section**

### **Materials and instruments**

Hydrogen tetrachloroaurate (III) ( $\text{HAuCl}_4 \cdot 4\text{H}_2\text{O}$ , 99.99%), trisodium citrate ( $\text{C}_6\text{H}_5\text{Na}_3\text{O}_7 \cdot 2\text{H}_2\text{O}$ ) and sodium dodecylsulfate (SDS) were obtained from China National Pharmaceutical (Shanghai, China); glutathione (GSH), 3-(4,5-dimethylthiazol-2-yl)-2,5-diphenyltetrazolium bromide (MTT) were purchased from Sigma. All chemicals were analytical grade and used without further purification. Ultrapure water was purified to a resistivity of  $18.2 \text{ M}\Omega \cdot \text{cm}$ . Lys-Lys-Lys-Lys-{Se-Cys}, Lys-Lys-Lys-Lys-Cys, Glu-Glu-Glu-Glu-{Se-Cys} and Glu-Glu-Glu-Glu-Cys were synthesized and purified by Karebay Biochem (Ningbo, China). The human breast cancer cells MCF-7 were obtained from the Type Culture Collection of the Chinese Academy of Sciences (Shanghai, China). Cell culture products, unless mentioned otherwise, were purchased from Invitrogen (USA).

The transmission electron microscopy (TEM) was carried out on a Hitachi HT7700 transmission electron microscope (JEOL, Japan) and the samples were prepared *via* carbon-coated copper grids. Centrifugation was performed on an Eppendorf 5417R Centrifuge. Zeta potential and dynamic light scattering measurements were performed on a Malvern Zeta Sizer Nano (Malvern). Absorbance was measured in a microplate reader (Synergy 2, Biotek, USA). All pH values were measured by a pH-3c digital pH meter (LeiCi, China) with a combined glass-calomel electrode.

### **Preparation of the Au NPs**

The 13 nm Au NPs were synthesized by the classical sodium citrate reduction method reported before. Typically, 70 mL HAuCl<sub>4</sub> (0.01% w.p.) aqueous solution was heated to boiling point with vigorous stirring, and 3.5 mL of trisodium citrate solution (1% w.p.) was rapidly added under stirring. The solution color changed from pale yellow to colorless and finally to burgundy. The solution was kept boiling for additional 20 min, and then cooled down to room temperature under stirring. Afterwards, the solution was filtered by using a 0.45 μm Millipore membrane filter and stored in refrigerator at 4 °C for further experiments.

### **Cell culture**

Dulbecco's modified Eagle's medium (DMEM) was used for the MCF-7 cells culture, which supplemented with 10% fetal bovine serum and 100 U/mL 1% antibiotics (penicillin/streptomycin), and incubated in a humidified atmosphere of 5% CO<sub>2</sub> and 95% air at 37 °C.

### **Cell toxicity**

The toxicity was measured *via* the following MTT assay in the MCF-7 cells. The cells were dispersed in replicated 96-well microtiter plates and incubated at 37 °C in 5% CO<sub>2</sub> and 95% air for 24 h. After the original medium was removed, different concentrations of the Au-Se-C<sub>4</sub>-N<sub>6</sub> (0, 1, 2, 3, 4, 5 nM) were respectively added to each well, and then incubated for 4h with different concentration respectively. The original medium was removed and replaced with another medium containing MTT (0.5 mg/mL). The cells were incubated at 37 °C for another 4 h, and then the medium was removed. DMSO (100 μL) was added to the cells to dissolve the produced formazan. The absorbance at

490 nm was recorded for each well. The viability was calculated based on the recorded data. All the experiments were repeated at least three times.

### **Animals**

Female BALB/c nude mice aged 6 weeks were subcutaneously injected with a suspension of MCF-7 cells ( $2 \times 10^6$ ) in PBS. The tumors were allowed to grow until they reached a suitable size (150-200 mm<sup>3</sup>). The tumor sizes were measured with a caliper every two days and their volumes were calculated using the formula: volume = (tumor length)  $\times$  (tumor width)<sup>2</sup>/2. Relative tumor volume was calculated based on  $v/v_0$  (where  $v_0$  is the initial tumor volume).

## Supporting Figures

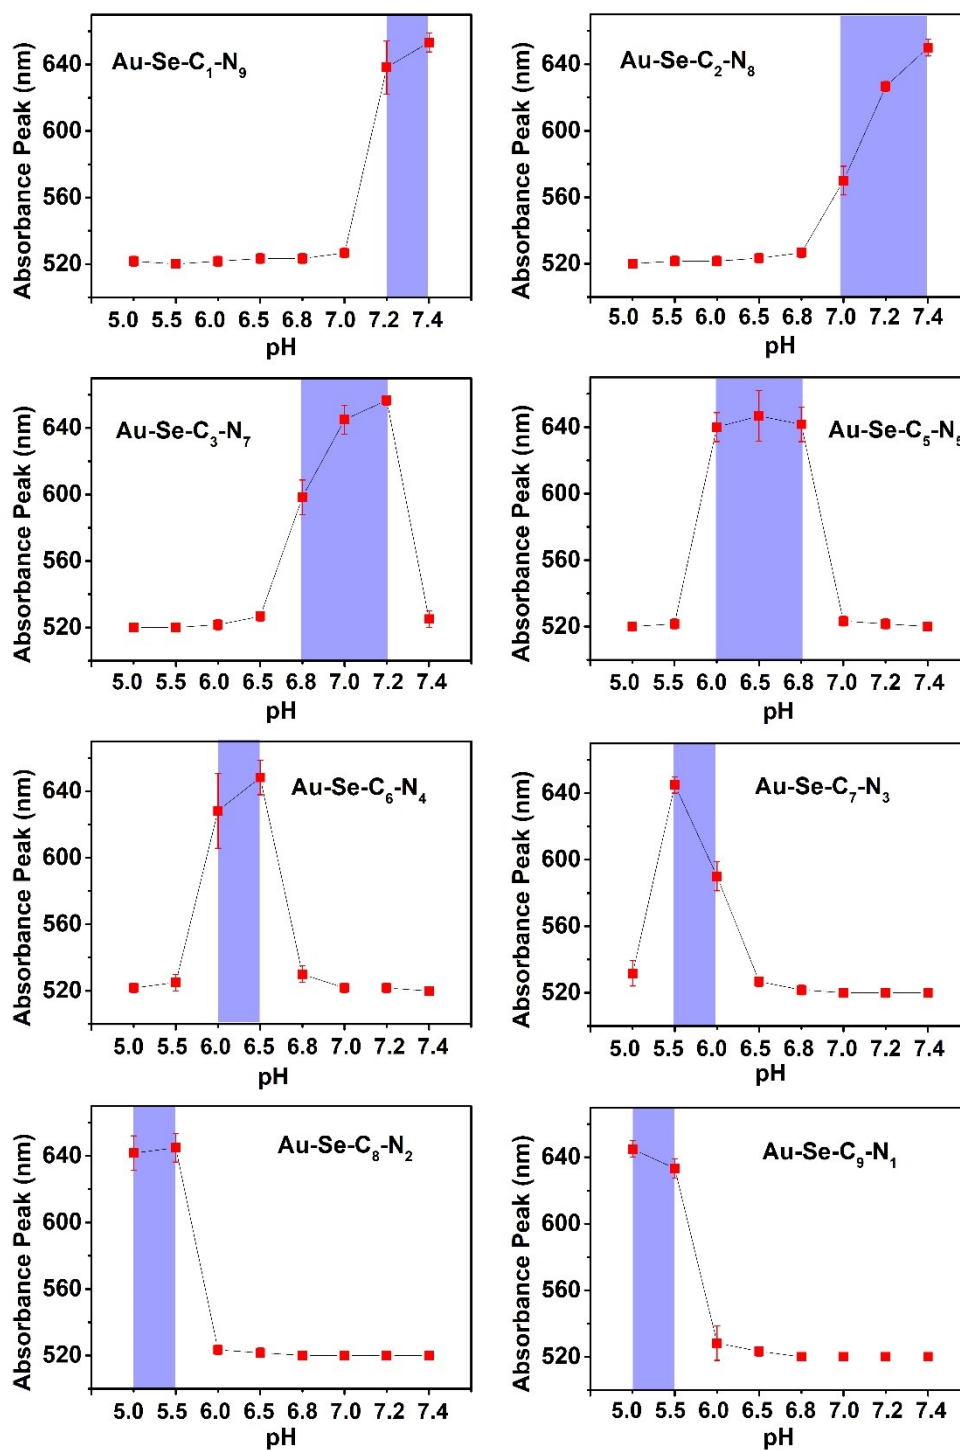

**Fig. S1** Absorbance peak values of Au-Se-C<sub>x</sub>-N<sub>y</sub> with different X:Y molar ratios detected by UV-vis spectrum at different pH values.

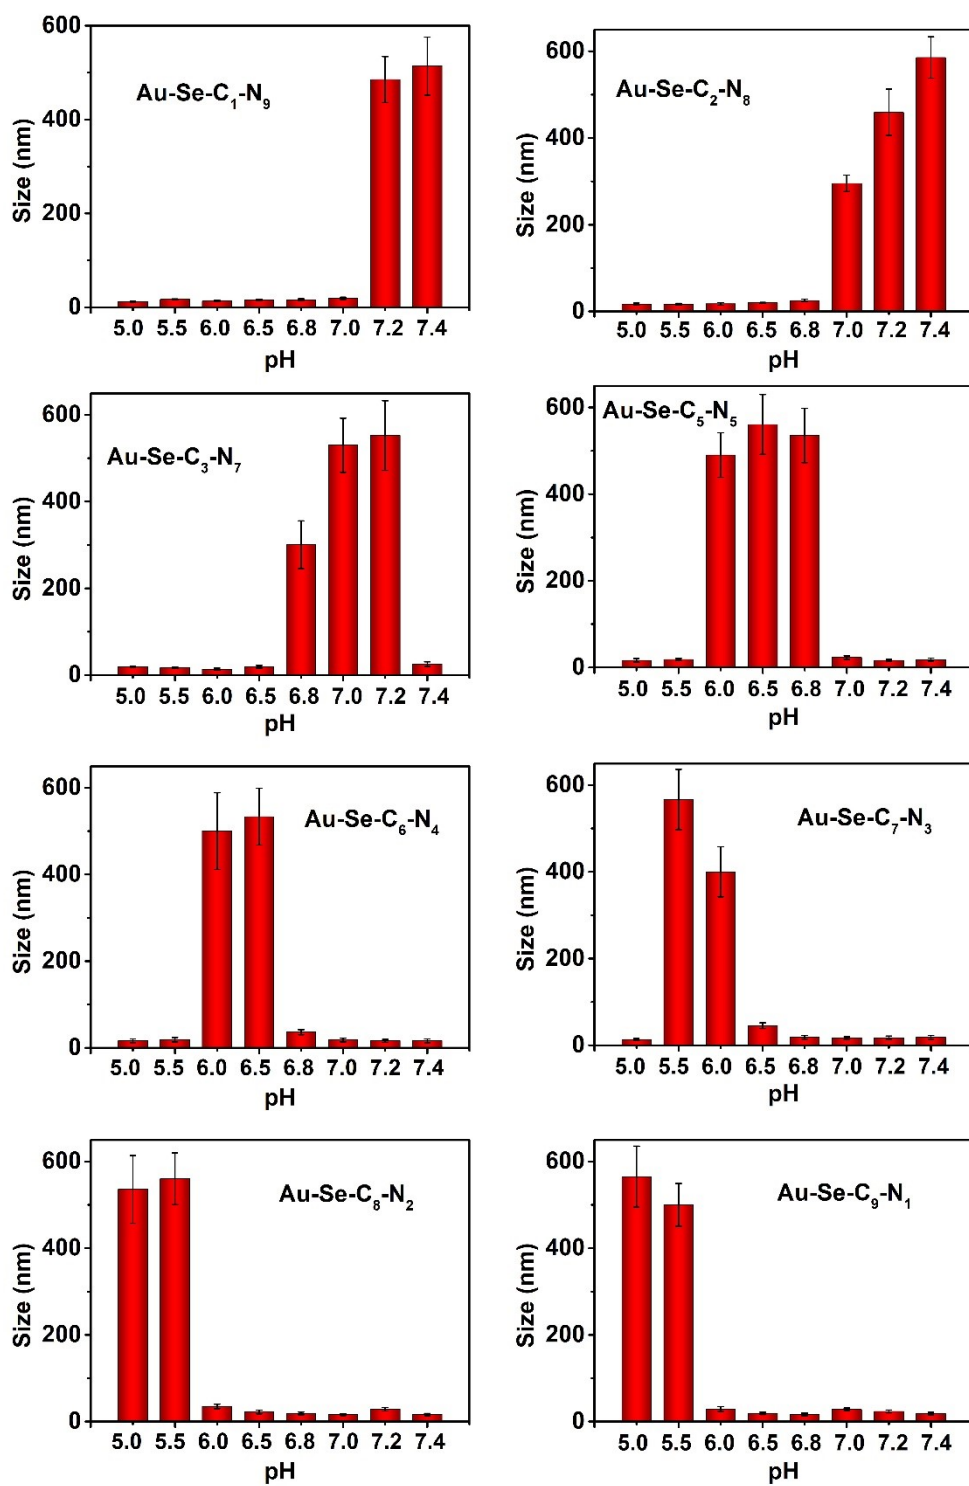

**Fig. S2** Sizes of Au-Se-C<sub>x</sub>-N<sub>y</sub> with different X:Y molar ratios in different pH PBS solution.

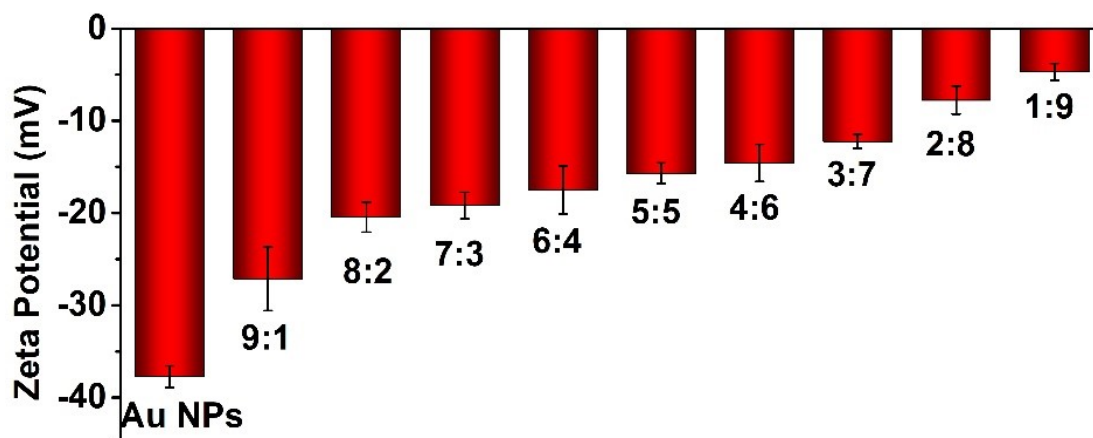

**Fig. S3** Zeta potential of the Au NPs and Au-Se-C<sub>x</sub>-N<sub>y</sub> with different X:Y molar ratios at pH 7.4.

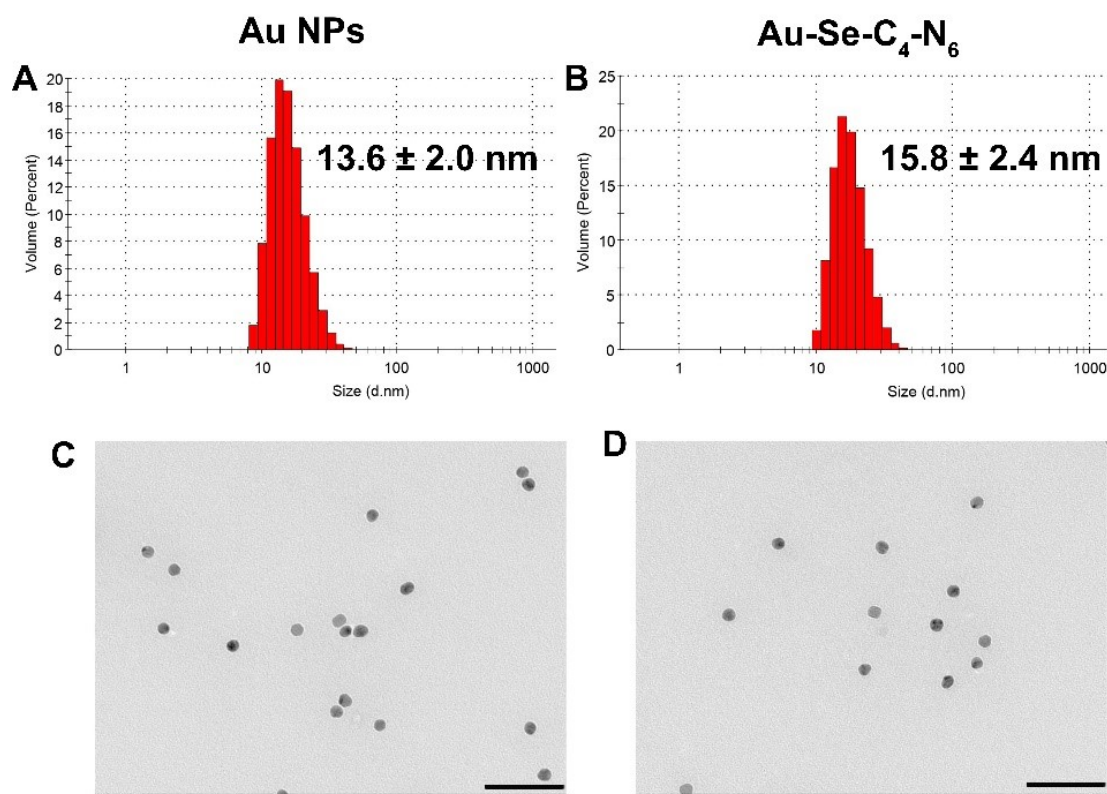

**Fig. S4** The size distribution of (A) Au NPs and (B) Au-Se-C<sub>4</sub>-N<sub>6</sub> determined by dynamic light scattering (DLS). The transmission electron microscopy (TEM) images of (C) Au NPs and (D) Au-Se-C<sub>4</sub>-N<sub>6</sub> (scale bars in images are 100 nm).



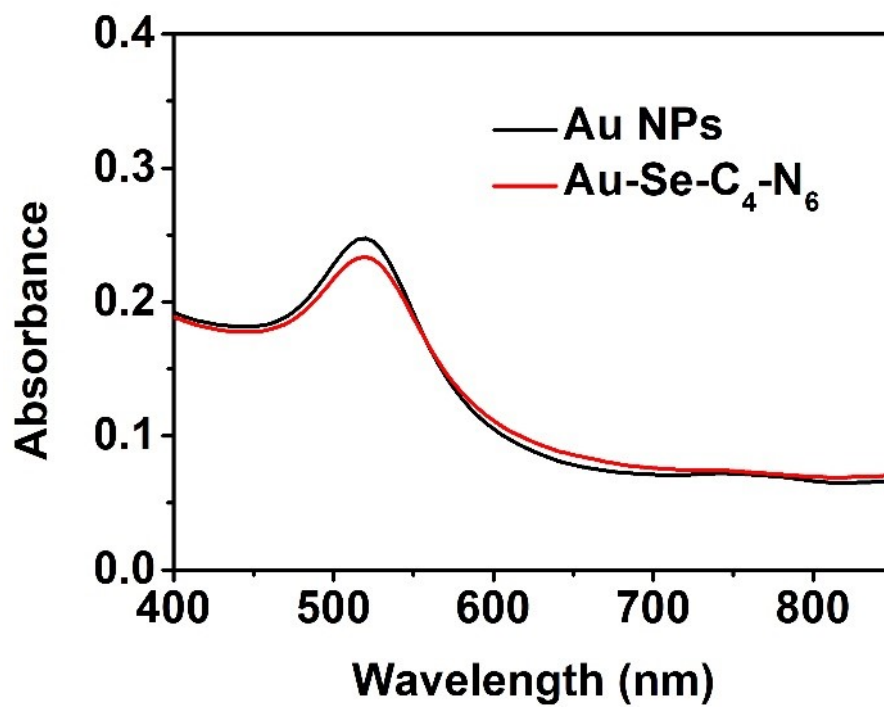

**Fig. S5** UV-vis absorption spectra of the Au NPs and Au-Se-C<sub>4</sub>-N<sub>6</sub>.

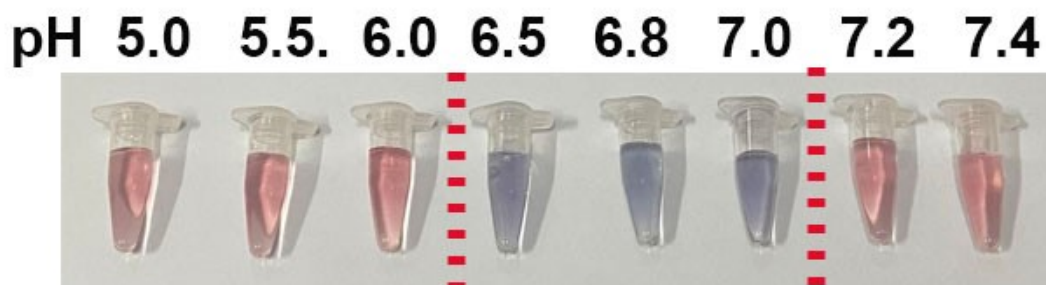

**Fig. S6** Digital images of Au-Se-C<sub>4</sub>-N<sub>6</sub> at different pH conditions. Clear red color means excellent dispersion of Au NPs. Samples between two dash lines are aggregated Au NPs (blue). The others are nonaggregated Au NPs.

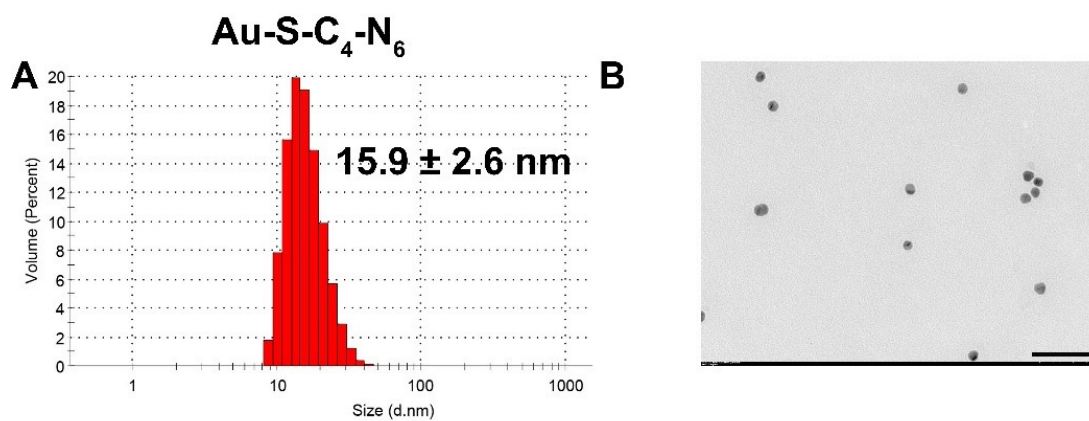

**Fig. S7** (A) The size distribution of Au-S-C<sub>4</sub>-N<sub>6</sub> determined by DLS. (B) The TEM images of Au-S-C<sub>4</sub>-N<sub>6</sub> (the scale bar is 100 nm).

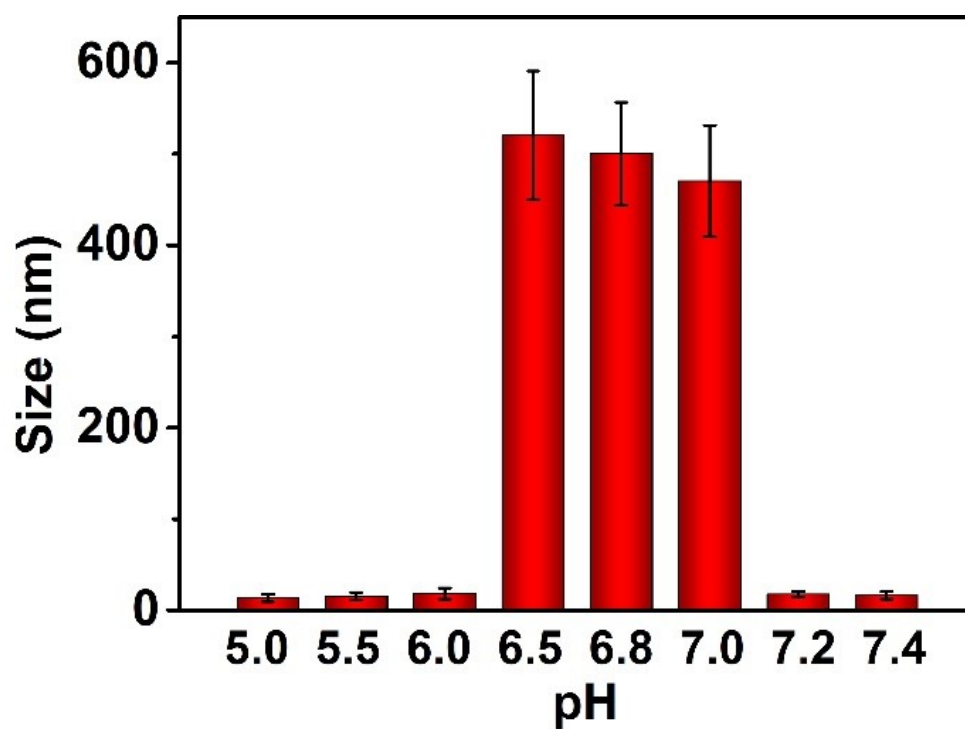

**Fig. S8** Sizes of Au-S-C<sub>4</sub>-N<sub>6</sub> in PBS buffer (10 mM) solution at different pH values.

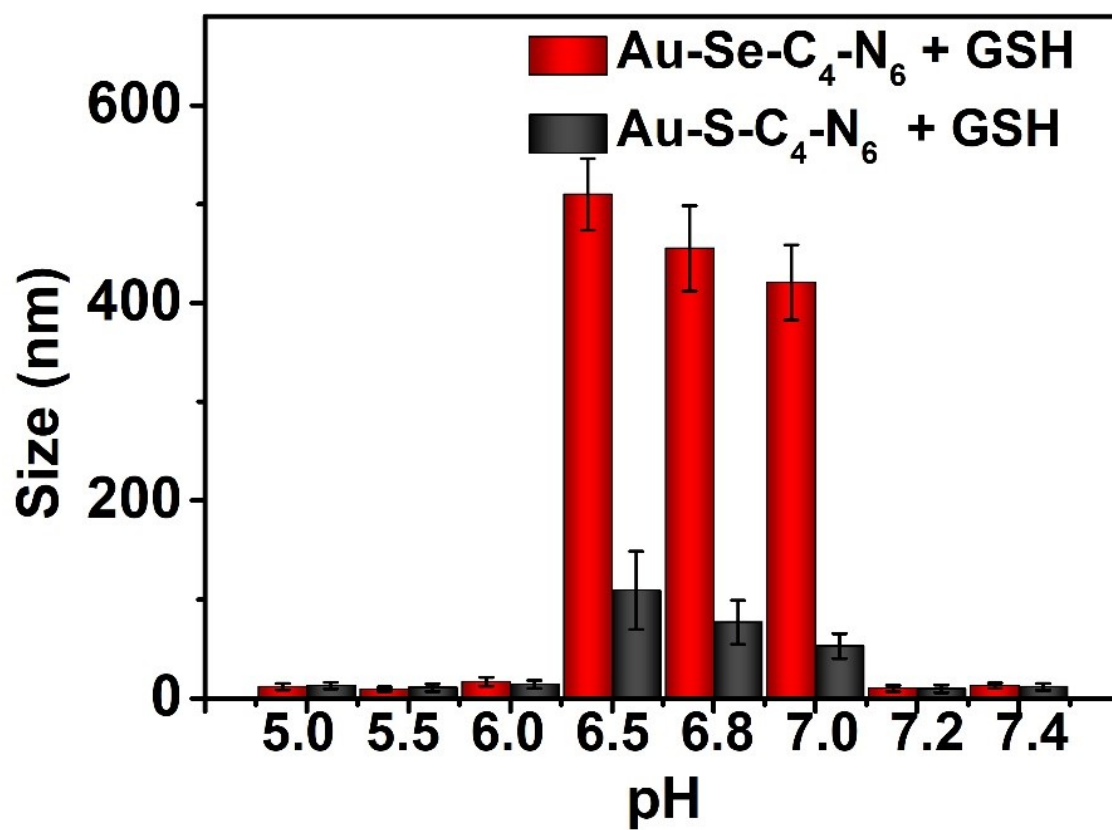

**Fig. S9** Sizes of (A) Au-Se-C<sub>4</sub>-N<sub>6</sub> and (B) Au-S-C<sub>4</sub>-N<sub>6</sub> in PBS buffer (10 mM) solution in present of GSH at different pH values.

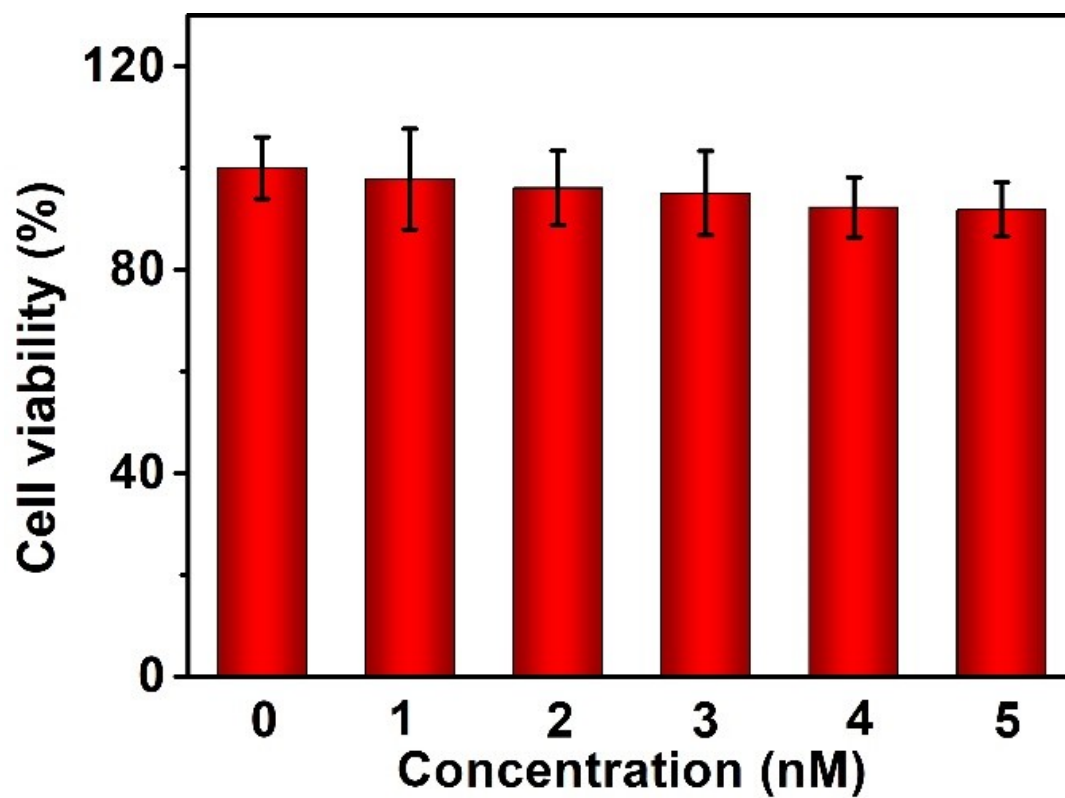

**Fig. S10** Cell cytotoxicity after incubation with Au-Se-C<sub>4</sub>-N<sub>6</sub> at different concentrations for 24 h.

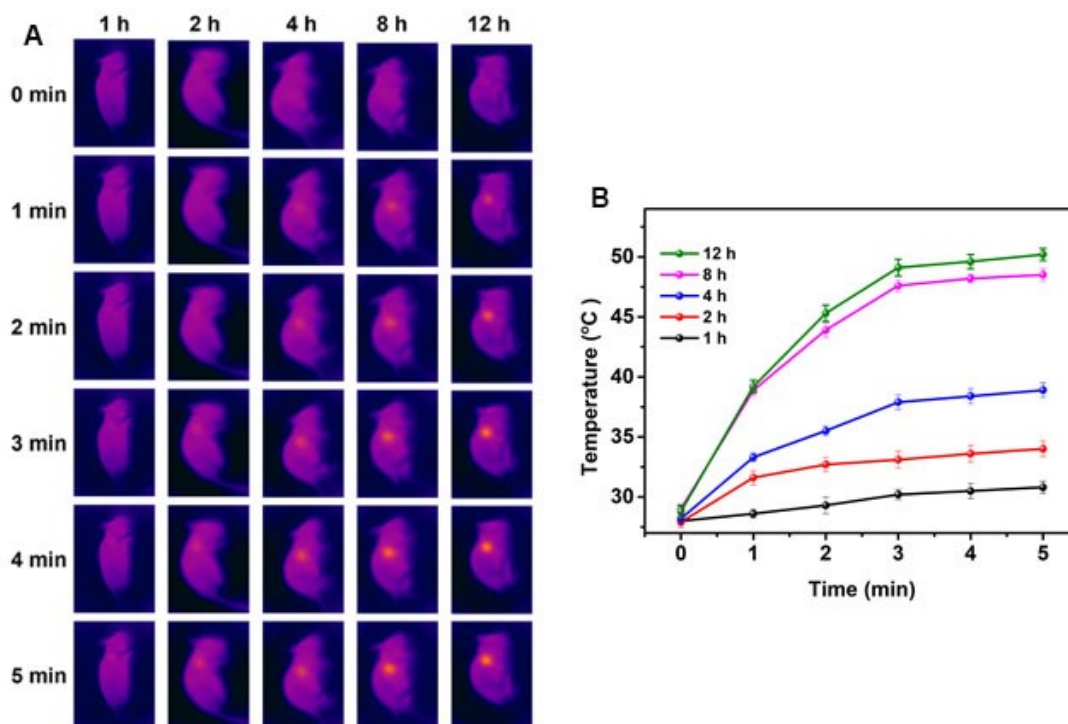

**Fig. S11** (A) Time-dependent infrared thermal images and (B) temperature changes at the tumor sites of MCF-7-tumor-bearing mouse subjected to 5 min laser irradiation (808 nm, 2 W/cm<sup>2</sup>) at 1 h, 2 h, 4 h, 8 h, or 12 h after being intravenous injection administered with Au-Se-C<sub>4</sub>-N<sub>6</sub>.

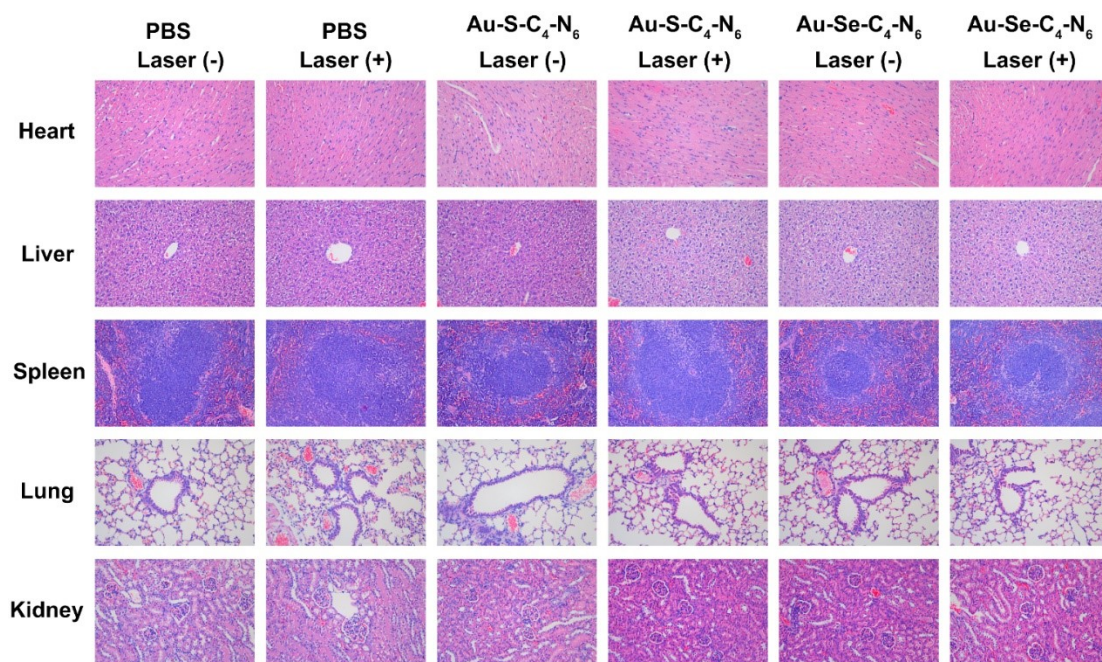

**Fig. S12** Representative images of H&E staining for heart, liver, spleen, lung and kidney collected on day 14 after killing the mice.
